# Supplementary material
Source: PubMed Central journal article supplement (PMC7686015)

Supplemental Figure 1. Mean ( $\pm$  SEM) salivary cortisol concentrations for women with (IPV+PTSD) and without (IPV – PTSD) and non-traumatic control (NTC) groups at the third TSST (3-month follow-up).

Supplemental Figure 2. Mean ( $\pm$  SEM) salivary cortisol concentrations for women with (IPV+PTSD) and without (IPV – PTSD) and non-traumatic control (NTC) groups at the fourth TSST (6-month follow-up).

Supplemental Figure 1.

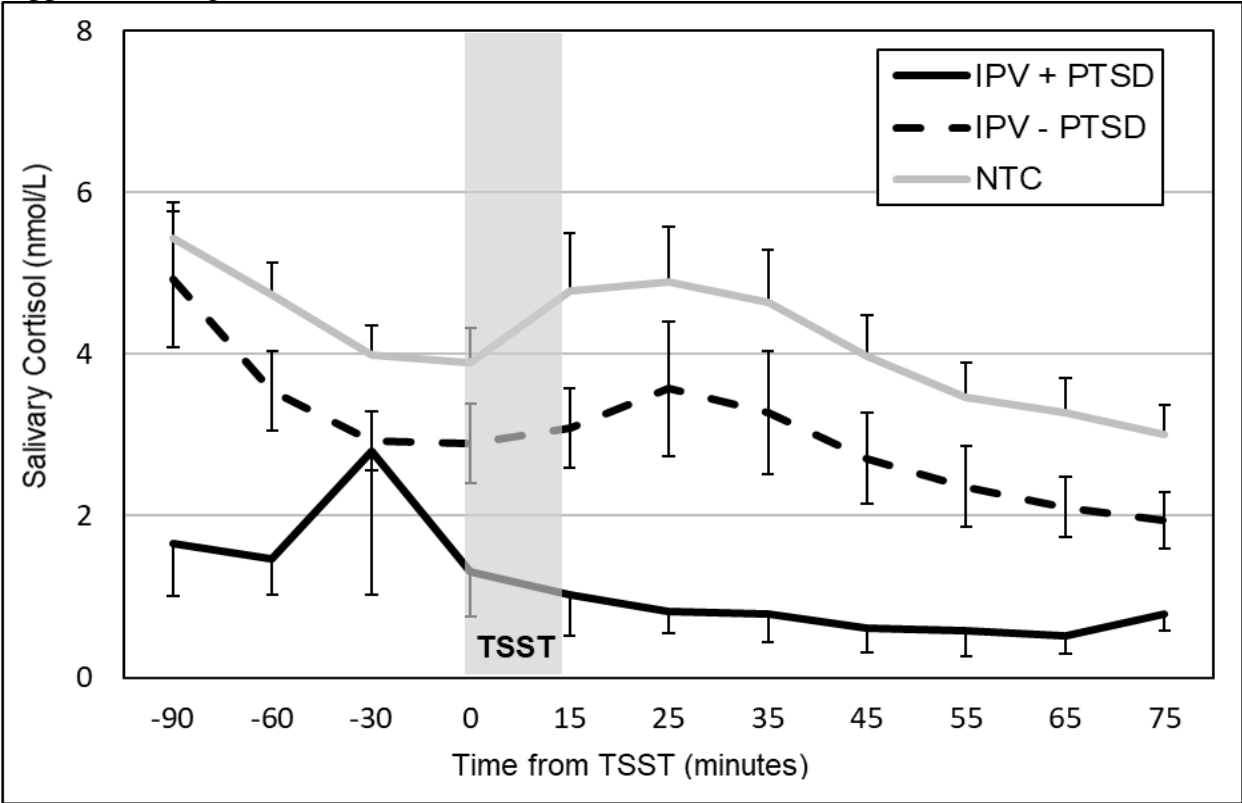

Supplemental Figure 2.

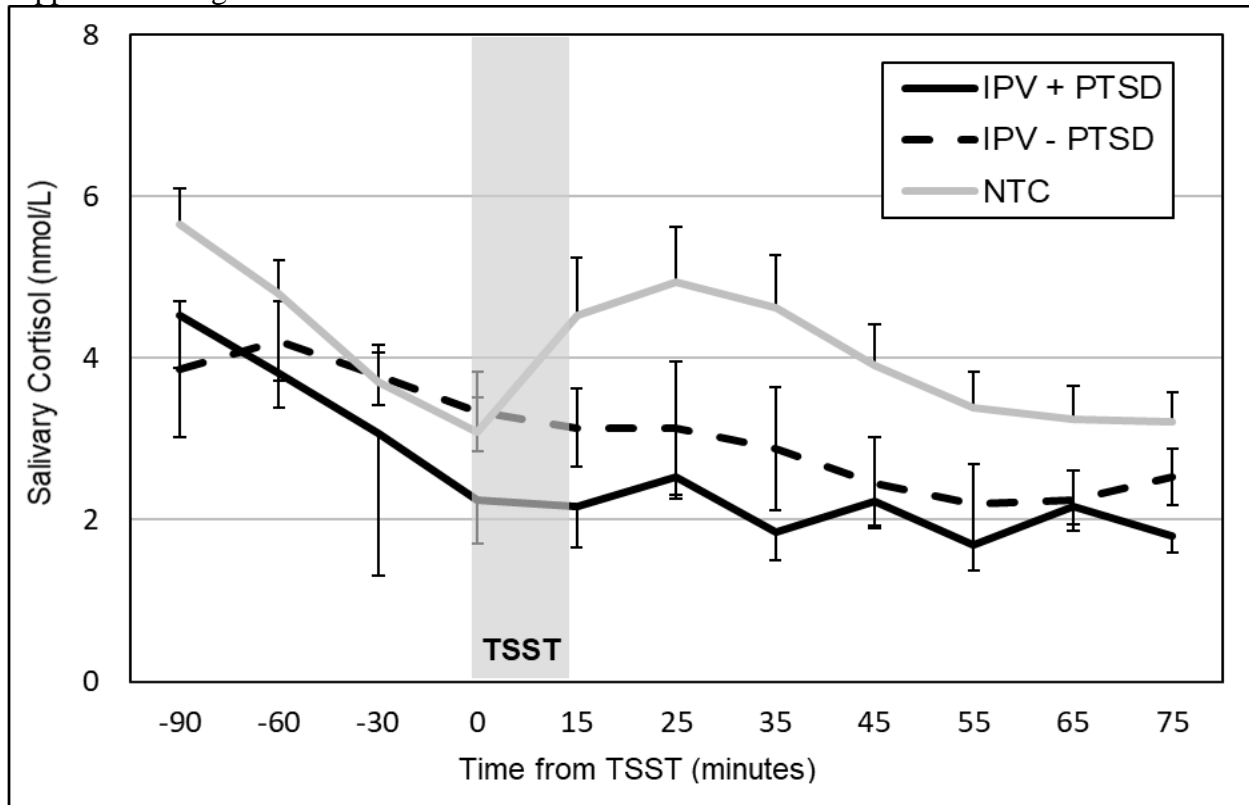

Supplement: NIHMS1637464-supplement-1.pdf [file NIHMS1637464-supplement-1.pdf]
